# Supplementary material for: In Silico Molecular Analysis of Carbapenemase-Negative Carbapenem-Resistant Pseudomonas aeruginosa Strains in Greece
Source: MDPI journal article supplement (doi:10.3390/microorganisms12040805), 2024-04-16
Supplement: s1 [file s1]

---

## In Silico Molecular Analysis of Carbapenemase-Negative Carbapenem-Resistant *Pseudomonas aeruginosa* Strains in Greece

Katerina Tsilipounidaki, Christos-Georgios Gkoutinoudis, Zoi Florou, George C. Fthenakis, and Efthymia Petinaki

**Figure S1:** Diagram of the transcriptional regulatory mechanisms controlling MexAB-OprM efflux pumps in *Pseudomonas aeruginosa*: transcriptional repression of the mexAB-oprM operon is mediated directly by MexR and NalD proteins and indirectly by NalC, which represses ArmR protein, an anti-repressor of MexR.

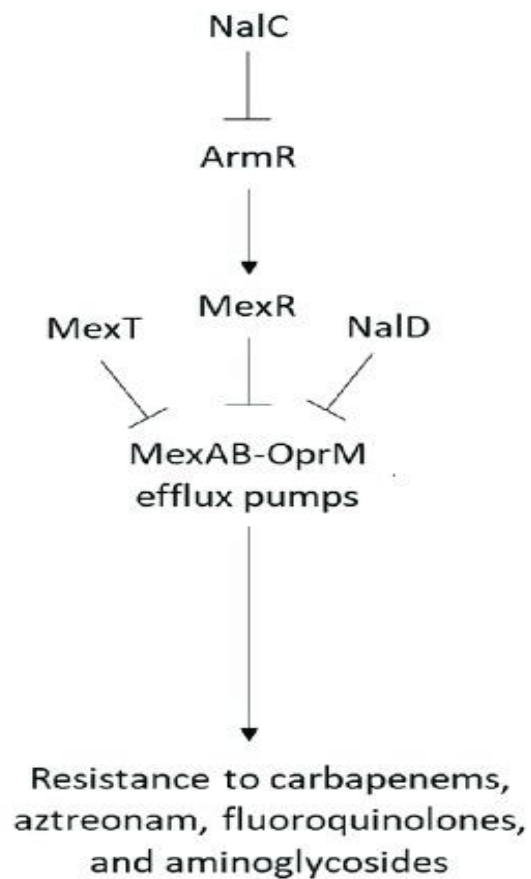

**Table S1:** Sequences of the *Pseudomonas aeruginosa* strains, aligned with ClustalW (using default parameters), where occurrences of frame shifts or stop codons have been detected. Premature stop codons are visually highlighted in red, while the first nucleotide or gap signifying a frame shift is highlighted in green. In *oprD* gene, premature stops codons were detected in strains 3, 6, 20 and 21, while in strain 8, a deletion of 20 amino acids was detected due to the presence of a premature stop codon. In the *nalC* gene, strain 18 exhibited a premature stop codon, whereas strain 19 displayed a frame shift was detected at position 18. In the *mexR* gene, a premature stop codon was detected in strain 1; in strain 18 exhibited a frame shift, due to a 7-nucleotide gap at position 266.

*oprD*

CLUSTAL 2.1 multiple sequence alignment

|      |                                                               |
|------|---------------------------------------------------------------|
| PAO1 | ATGAAAGTGATGAAGTGGAGCGCCATTGCACTGGCGGTTTCCGCAGGTAGCACTCAGTTC  |
| 8    | ATGAAAGTGATGAAGTGGAGCGCCATTGCACTGGCGGTTTCCGCAGGTAGCACTCAGTTC  |
| 20   | ATGAAAGTGATGAAGTGGAGCGCCATTGCACTGGCGGTTTCCGCAGGTAGCACTCAGTTC  |
| 6    | ATGAAAGTGATGAAGTGGAGCGCCATTGCACTGGCGGTTTCCGCAGGTAGCACTCAGTTC  |
| 3    | ATGAAAGTGATGAAGTGGAGCGCCATTGCACTGGCGGTTTCCGCAGGTAGCACTCAGTTC  |
| 21   | ATGAAAGTGATGAAGTGGAGCGCCATTGCACTGGCGGTTTCCGCAGGTAGCACTCAGTTC  |
|      | *****                                                         |
| PAO1 | GCCGTGGCCGACGCATTCGTCAGCGATCAGGCCGAAGCGAAGGGGTTTCATCGAAGACAGC |
| 8    | GCCGTGGCCGACGCATTCGTCAGCGATCAGGCCGAAGCGAAGGGGTTTCATCGAAGACAGC |
| 20   | GCCGTGGCCGACGCATTCGTCAGCGATCAGGCCGAAGCGAAGGGGTTTCATCGAAGACAGC |
| 6    | GCCGTGGCCGACGCATTCGTCAGCGATCAGGCCGAAGCGAAGGGGTTTCATCGAAGACAGC |
| 3    | GCCGTGGCCGACGCATTCGTCAGCGATCAGGCCGAAGCGAAGGGGTTTCATCGAAGACAGC |
| 21   | GCCGTGGCCGACGCATTCGTCAGCGATCAGGCCGAAGCGAAGGGGTTTCATCGAAGACAGC |
|      | *****                                                         |
| PAO1 | AGCCTCGACCTGCTGCTCCGCAACTACTATTTCAACCGTGACGGCAAGAGCGGCAGCGGG  |
| 8    | AGCCTCGACCTGCTGCTCCGCAACTACTATTTCAACCGTGACGGCAAGAGCGGCAGCGGG  |
| 20   | AGCCTCGACCTGCTGCTCCGCAACTACTATTTCAACCGTGACGGCAAGAGCGGCAGCGGG  |
| 6    | AGCCTCGACCTGCTGCTCCGCAACTACTATTTCAACCGTGACGGCAAGAGCGGCAGCGGG  |
| 3    | AGCCTCGACCTGCTGCTCCGCAACTACTATTTCAACCGTGACGGCAAGAGCGGCAGCGGG  |
| 21   | AGCCTCGACCTGCTGCTCCGCAACTACTATTTCAACCGTGACGGCAAGAGCGGCA-CGGG  |
|      | ***** ****                                                    |
| PAO1 | GACCGCGTCGACTGGACCCAAGGCTTCCTCACCACCTATGAATCCGGCTTCACCCAAGGC  |
| 8    | GACCGCGTCGACTGGACCCAAGGCTTCCTCACCACCTATGAATCCGGCTTCACCTCAAGGC |
| 20   | GACCGCGTCGACTGGACC-AAGGCTTCCTCACCACCTATGAATCCGGCTTCACCCAAGGC  |
| 6    | GACCGCGTCGACTGGACCCAAGGCTTCCTCACCACCTATGAATCCGGCTTCACCCAAGGC  |
| 3    | GACCGCGTCGACTGGACCCAAGGCTTCCTCACCACCTATGAATCCGGCTTCACCCAAGGC  |
| 21   | GACCGCGTCGACTGGACCCAAGGCTTCCTCACCACCTATGAATCCGGCTTCACCCAAGGC  |
|      | ***** *****                                                   |

---

PAO1 ACTGTGGGCTTCGGCGTCGATGCCTTCGGCTACCTGGGCCTGAAGCTCGACGGCACCTCC  
8 ACCGTGGGCTTCGGCGTCGATGCCTTCGGCTACCTGGGCCTGAAGCTCGACGGCACCTCC  
20 ACCGTGGGCTTCGGCGTCGATGCCTTCGGCTACCTCGGCC**TGA**AGCTCGACGGCACCTCG  
6 ACTGTGGGCTTCGGCGTCGATGCCTTCGGCTACCTCGGCCTGAAGCTCGACGGTACCTCT  
3 ACCGTGGGCTTCGGCGTCGATGCCTTCGGCTACCTCGGTCTGAAGCTCGACGGCACCTCG  
21 ACCGTGGGCTTCGGCGTCGATGCCTTCGGCTACCTCGGT**TGA**AGCTCGACGGCACCTCG  
\*\* \*\*\*\*\* \*\* \*\*\*\*\* \*\*

PAO1 GACAAGACCGGCACCGGCAACCTGCCGGTGATGAACGACGGCAAGCCGCGCGATGACTAC  
8 GACAAGACCGGCACCGGCAACCTGCCGGTGATGAACGACGGCAAGCCGCGCGATGACTAC  
20 GACAAGACCGGCACCGGCAACCTGCCGGTGATGAACGACGGCAAGCCGCGCGACGACTAC  
6 GACAAGAGCGGCACCGGCAACCTGCCAGTAATGAACGACGGAACCCCCGTGACGACTAC  
3 GACAAGAGCGGTACCGGCAACCTGCCGGTGATGAACGACGGCACGCCCCGTGACGACTAC  
21 GACAAGAGCGGTACCGGCAACCTGCCGGTGATGAACGACGGCACGCCCCGTGACGACTAC  
\*\*\*\*\* \*\* \*\*\*\*\* \*\* \*\*\*\*\* \* \*\*\* \*\* \* \*\*\*\*\*

PAO1 AGCCGCGCCGGCGGCGCCGTGAAGGTGCGCATCTCCAAGACCATGCTGAAGTGGGGCGAG  
8 AGCCGCGCCGGCGGCGCCGTGAAGGTGCGCATCTCCAAGACCATGCTGAAGTGGGGCGAG  
20 AGCCGCGCTGGCGGCGCCCTGAAGGTGCGCATTTCCAAGACCATGCTGAAGTGGGGCGAA  
6 AGCCGCGCCGGTGGCGCCGTGAAGGTACGCATCTCCAAGACCATGCTGAAGTGGGGCGAG  
3 AGCCGCGCCGGTGGCGCCGTGAAGGTACGCATCTCCAAGACCATGTTGAAGTGGGGCGAG  
21 AGCCGCGCCGGTGGCGCCGTGAAGGTACGCATCTCCAAGACCATGTTGAAGTGGGGCGAG  
\*\*\*\*\* \*\* \*\*\*\*\* \*\*\*\*\* \*\*\*\*\* \*\*\*\*\*

PAO1 ATGCAACCGACCGCCCCGGTCTTCGCCGCTGGCGG-CAGCCGCCTGTTCCCGCAGACCGC  
8 ATGCAACCGACCGCCCCGGTCTTCGCCGCTGGCGG-CAGCCGCCTGTTCCCGCAGACCGC  
20 ATGCAACCTACCGCGCCGGTCTTCGCCGCCGGCGG-CAGCCGCCTGTTCCCGCAGACCGC  
6 ATGCAGCCGACCGCTCCGGTCTTCGCCGCTGGGGGGCAGCCGCCTGTTCCCCCAGACCGC  
3 ATG**TAG**CCGACCGCTCCGGTCTTCGCCGCCGGCGG-CAGCCGCCTGTTCCCGCAGACCGC  
21 ATGCAGCCGACCGCTCCGGTCTTCGCCGCCGGCGG-CAGCCGCCTGTTCCCGCAGACCGC  
\*\*\* \* \*\* \*\*\*\*\* \*\*\*\*\* \*\* \*\* \*\*\*\*\* \*\*\*\*\*

PAO1 GACCGGCTTCCAGCTGCAGAGCAGCGAATTCGAAGGGCTCGACCTCGAGGCAGGCCACTT  
8 GACCGGCTTCCAGCTGCAGAGCAGCGAATTCGAAGGGCTCGACCTCGAGGCAGGCCACTT  
20 GACCGGCTTCCAACTGCAGAGCAGTGAATTCGAAGGGCTCGATCTCGAAGCGGGCCACTT  
6 GACCGGCTTCCAGCTGCAGAGCAGCGAATTCGAAGGGCTCGACCTCGAGGCAGGCCACTT  
3 GACCGGCTTCCAACTGCAGAGCAGCGAATTCGAAGGGCTCGATCTCGAAGCGGGCCACTT  
21 GACCGGCTTCCAACTGCAGAGCAGCGAATTCGAAGGGCTCGATCTCGAAGCGGGCCACTT  
\*\*\*\*\* \*\*\*\*\* \*\*\* \*\*\*\*\* \*\*\*\*\* \*\* \*\*\*\*\*

---

PAO1 CACCGAGGGCAAGGAGCCGACCACCGTCAAATCGCGTGGCGAACTCTATGCCACCTACGC  
8 CACCGAGGGCAAGGAGCCGACCACCGTCAAATCGCGTGGCGAACTCTATGCCACCTACGC  
20 CACCGAGGGCAAGGAGCCGACCACCGTCAAATCGCGTGGCGAACTCTATGCCACCTACGC  
6 CACCGAGGGCAAGGAGCCGACCACCGTCAAATCGCGTGGCGAACTCTATGCCACCTACGC  
3 CACCGAAGGCAAGCAGGGCACCACCACCAAGTCGCGCGGCGAACTCTACGCAACCTATGC  
21 CACCGAAGGCAAGCAGGGCACCACCACCAAGTCGCGCGGCGAACTCTACGCAACCTATGC  
\*\*\*\*\* \*\*

PAO1 AGGCGAGACCGCCAAGAGCGCCGATTTCATTGGGGCCGCTACGCAATCACCGATAACCT  
8 AGGCGAGACCGCCAAGAGCGCCGATTTCATTGGGGCCGCTACGCAATCACCGATAACCT  
20 AGGCGAGACCGCCAAGAGCGCCGATTTCATTGGGGCCGCTACGCAATCACCGATAACCT  
6 AGGCGAGACCGCCAAGAGCGCCGATTTCATTGGGGCCGCTACGCAATCACCGATAACCT  
3 AGGCGAGACCGCCAAGAGCGCCGATTTCATTGGGGCCGCTACGCAATCACCGATAACCT  
21 AGGCGAGACCGCCAAGAGCGCCGATTTCATTGGGGCCGCTACGCAATCACCGATAACCT  
\*\*\*\*\*

PAO1 CAGCGCCTCCCTGTACGGCGCCGAACCTCGAAGACATCTATCGCCAGTATTACCTGAACAG  
8 CAGCGCCTCCCTGTACGGCGCCGAACCTCGAAGACATCTATCGCCAGTATTACCTGAACAG  
20 CAGCGCCTCCCTGTACGGCGCCGAACCTCGAAGACATCTATCGCCAGTATTACCTGAACAG  
6 CAGCGCCTCCCTGTACGGCGCCGAACCTCGAAGACATCTATCGCCAGTATTACCTGAACAG  
3 CAGCGCCTCCCTGTACGGTGTGAACTCGAAGACATCTATCGTCAGTATTACCTGAACAG  
21 CAGCGCCTCCCTGTACGGTGTGAACTCGAAGACATCTATCGTCAGTATTACCTGAACAG  
\*\*\*\*\*

PAO1 CAACTACACCATCCCCTGGCATCCGACCAATCGCTGGGCTTCGATTTCAACATCTACCG  
8 CAACTACACCATCCCCTGGCATCCGACCAATCGCTGGGCTTCGATTTCAACATCTACCG  
20 CAACTACACCATCCCCTGGCATCCGACCAATCGCTGGGCTTCGATTTCAACATCTACCG  
6 CAACTACACCATCCCCTGGCATCCGACCAATCGCTGGGCTTCGATTTCAACATCTACCG  
3 CAACTACACCATCCCCTGGCATCCGACCAATCGCTGGGCTTCGATTTCAACATCTACCG  
21 CAACTACACCATCCCCTGGCATCCGACCAATCGCTGGGCTTCGATTTCAACATCTACCG  
\*\*\*\*\*

PAO1 CACAAACGATGAAGGCAAGGCCAAGGCCGGCGACATCAGCAACACCACTTGGTCCCTGGC  
8 CACAAACGATGAAGGCAAGGCCAAGGCCGGCGACATCAGCAACACCACTTGGTCCCTGGC  
20 CACAAACGATGAAGGCAAGGCCAAGGCCGGCGACATCAGCAACACCACTTGGTCCCTGGC  
6 CACAAACGATGAAGGCAAGGCCAAGGCCGGCGACATCAGCAACACCACTTGGTCCCTGGC  
3 CACAAACGATGAAGGCAAGGCCAAGGCCGGCGACATCAGCAACACCACTTGGTCCCTGGC  
21 CACAAACGATGAAGGCAAGGCCAAGGCCGGCGACATCAGCAACACCACTTGGTCCCTGGC  
\*\*\*\*\*

---

PAO1 GGCAGCCTACACTCTGGATGCGCACACTTTTACCTTGGCCTACCAGAAGGTCCATGGCGA  
8 GGCAGCCTACACTCTGGATGCGCACACTTTTACCTTGGCCTACCAGAAGGTCCATGGCGA  
20 GGCAGCCTACACTCTGGATGCGCACACTTTTACCTTGGCCTACCAGAAGGTCCATGGCGA  
6 GGCAGCCTACACTCTGGATGCGCACACTTTTACCTTGGCCTACCAGAAGGTCCATGGCGA  
3 GGCAGCCTACACTCTGGATGCGCACACTTTTACCTTGGCCTACCAGAAGGTCCATGGCGA  
21 GGCAGCCTACACTCTGGATGCGCACACTTTTACCTTGGCCTACCAGAAGGTCCATGGCGA  
\*\*\*\*\*

PAO1 TCAGCCGTTTGATTATATCGGCTTCGGCCGCAACGGCTCTGGCGCAGGTGGCGACTCGAT  
8 TCAGCCGTTTGATTATATCGGCTTCGGCCGCAACGGCTCTGGCGCAGGTGGCGACTCGAT  
20 TCAGCCGTTTGATTATATCGGCTTCGGCCGCAACGGCTCTGGCGCAGGTGGCGACTCGAT  
6 TCAGCCGTTTGATTATATCGGCTTCGGCCGCAACGGCTCTGGCGCAGGTGGCGACTCGAT  
3 TCAGCCGTTTGATTATATCGGCTTCGGCGAGAACGGTTCCGGCGGCGGCGGTGACTCGAT  
21 TCAGCCGTTTGATTATATCGGCTTCGGCGAGAACGGTTCCGGCGGCGGCGGTGACTCGAT  
\*\*\*\*\* \*\* \*\* \*\* \*\*

PAO1 TTTCTCGCCAACTCTGTCCAGTACTCCGACTTCAACGGCCCTGGCGAGAAATCCTGGCA  
8 TTTCTCGCCAACTCTGTCCAGTACTCCGACTTCAACGGCCCTGGCGAGAAATCCTGGCA  
20 TTTCTCGCCAACTCTGTCCAGTACTCCGACTTCAACGGCCCTGGCGAGAAATCCTGGCA  
6 TTTCTCGCCAACTCTGTCCAGTACTCCGACTTCAACGGCCCTGGCGAGAAATCCTGGCA  
3 TTTCTCGCCAACTCCGTGCAGTACTCCGACTTCAACGGCCCCGGCGAGAAATCCTGGCA  
21 TTTCTCGCCAACTCCGTGCAGTACTCCGACTTCAACGGCCCCGGCGAGAAATCCTGGCA  
\*\*\*\*\* \*\* \*\*\*\*\*

PAO1 GGCTCGCTACGACCTGAACCTAGCCTCCTATGGCGTTCCCGGCCTGACTTTCATGGTCCG  
8 GGCTCGCTACGACCTGAACCTAGCCTCCTATGGCGTTCCCGGCCTGACTTTCATGGTCCG  
20 GGCTCGCTACGACCTGAACCTAGCCTCCTATGGCGTTCCCGGCCTGACTTTCATGGTCCG  
6 GGCTCGCTACGACCTGAACCTAGCCTCCTATGGCGTTCCCGGCCTGACTTTCATGGTCCG  
3 GGCCCGCTACGACCTGAACCTCGCCTCCTATGGCGTTCCCGGCCTGACTTTCATGGTCCG  
21 GGCCCGCTACGACCTGAACCTCGCCTCCTATGGCGTTCCCGGCCTGACTTTCATGGTCCG  
\*\*\* \*\*\*\*\*

PAO1 CTATATCAATGGCAAGGACATCGATGGCACCAAGATGTCTGACAACAACGTCGGCTATAA  
8 CTATATCAATGGCAAGGACATCGATGGCACCAAGATGTCTGACAACAACGTCGGCTATAA  
20 CTATATCAATGGCAAGGACATCGATGGCACCAAGATGTCTGACAACAACGTCGGCTATAA  
6 CTATATCAATGGCAAGGACATCGATGGCACCAAGATGTCTGACAACAACGTCGGCTATAA  
3 CTATATCAATGGCAAGGACATCGATGGCACCAAGATGTCTGACAACAACGTCGGCTATAA  
21 CTATATCAATGGCAAGGACATCGATGGCACCAAGATGTCTGACAACAACGTCGGCTATAA  
\*\*\*\*\*

---

|      |                                                              |
|------|--------------------------------------------------------------|
| PAO1 | GAACTACGGCTACGGCGAGGATGGCAAGCACCACGAAACCAACCTCGAAGCCAAGTACGT |
| 8    | GAACTACGGCTACGGCGAGGATGGCAAGCACCACGAAACCAACCTCGAAGCCAAGTACGT |
| 20   | GAACTACGGCTACGGCGAGGACGGCAAGCACCACGAGACCAACCTCGAAGCCAAGTACGT |
| 6    | GAACTACGGCTACGGCGAGGACGGCAAGCACCACGAGACCAACCTCGAAGCCAAGTACGT |
| 3    | GAACTACGGCTACGGCGAGGACGGCAAGCACCACGAGACCAACCTGGAAGCCAAGTACGT |
| 21   | GAACTACGGCTACGGCGAGGACGGCAAGCACCACGAGACCAACCTGGAAGCCAAGTACGT |
|      | *****                                                        |

|      |                                                              |
|------|--------------------------------------------------------------|
| PAO1 | GGTCCAGTCCGGTCCGGCCAAGGACCTGTCGTTCCGCATCCGCCAGGCCTGGCACCGTGC |
| 8    | GGTCCAGTCCGGTCCGGCCAAGGACCTGTCGTTCCGCATCCGCCAGGCCTGGCACCGTGC |
| 20   | GGTCCAGTCCGGTCCGGCCAAGGACCTGTCGTTCCGCATCCGCCAGGCCTGGCACCGTGC |
| 6    | GGTCCAGTCCGGTCCGGCCAAGGACCTGTCGTTCCGCATCCGCCAGGCCTGGCACCGTGC |
| 3    | GGTCCAGTCCGGTCCGGCCAAGGACCTGTCGTTCCGCATCCGCCAGGCCTGGCACCGCGC |
| 21   | GGTCCAGTCCGGTCCGGCCAAGGACCTGTCGTTCCGCATCCGCCAGGCCTGGCACCGCGC |
|      | *****                                                        |

|      |                                                                       |
|------|-----------------------------------------------------------------------|
| PAO1 | CAACGCCGACCAGGGCGAAGGCGACCAGAACGAGTTCCGCCTGATCGTCGACTATCCGCT          |
| 8    | CAACGCCGAC <b>TAG</b> GGCGAAGGCGACCAGAACGAGTTCCGCCTGATCGTCGACTATCCGCT |
| 20   | CAACGCCGACCAGGGCGAAGGCGACCAGAACGAGTTCCGCCTGATCGTCGACTATCCGCT          |
| 6    | CAACGCCGACCAGGGCGAAGGCGACCAGAACGAGTTCCGCCTGATCGTCGACTATCCGCT          |
| 3    | CAACGCCGACCAGGCCGAAGGCGACCAGAACGAGTTCCGCCTGATCGTCGACTATCCGCT          |
| 21   | CAACGCCGACCAGGCCGAAGGCGACCAGAACGAGTTCCGCCTGATCGTCGACTATCCGCT          |
|      | *****                                                                 |

|      |               |
|------|---------------|
| PAO1 | GTCGATCCTGTAA |
| 8    | GTCGATCCTGTAA |
| 20   | GTCGATCCTGTAA |
| 6    | GTCGATCCTGTAA |
| 3    | GTCGATCCTGTAA |
| 21   | GTCGATCCTGTAA |
|      | *****         |

---

# *nalC*

CLUSTAL 2.1 multiple sequence alignment

|      |                                                                      |
|------|----------------------------------------------------------------------|
| PAO1 | ATGAACGATGC-TTCTCCCCGTCTGACCGAACGCGGCAGGCAACGCCGCCGCGCCATGCT         |
| 19   | ATGAACGATGCGTCCCC <b>C</b> CGTCTGACCGAACGCGGCAGGCAACGCCGCCGCGCCATGCT |
| 18   | ATGAACGATGCGTCCCCCCCCGTCTGACCGAACGCGGCAGGCAACGCCGCCGCGCCATGCT        |
|      | *****                                                                |

---

PAO1 CGACGCCGCTACCCAGGCCTTTCTCGAACACGGTTTCGAAGGCACCACCCTGGACATGGT  
19 CGACGCCGCTACCCAGGCCTTTCTCGAACACGGTTTCGAAGGCACCACCCTGGACATGGT  
18 CGACGCCGCCACCCAGGCCTTTCTCGAACACGGTTTCGAAGGCACCACCCTGGACATGGT  
\*\*\*\*\*

PAO1 GATAGAACGGGCCGGTGGTTCACGGGGGACCCTGTACAGCTCCTTCGGCGGCAAGGAGGG  
19 GATAGAACGGGCCGGTGGTTCACGGGGGACCCTGTACAGCTCCTTCGGCGGCAAGGAGGG  
18 GATTGAACGGGCCGGTGGTTCACGGGGAACCCTGTACAGCTCCTTCGGCGGCAAGGAAGG  
\*\*\* \*\*\*\*\*

PAO1 CCTGTTCGCCGCGGTGATCGCCACATGATCGGGGAAATCTTCGACGACAGCGCCGATCA  
19 CCTGTTCGCCGCGGTGATCGCCACATGATCGAGGAAATCTTCGACGACAGCGCCGATCA  
18 CCTGTTTGCCGCGGTGATCGCCACATGATCGAGGAAATCTTCGACGACAGCGCCGATCA  
\*\*\*\*\*

PAO1 GCCGCGCCCCGCCGCCACGCTGAGCGCCACCCTCGAGCATTTTCGGCCGGCGCTTTCTCAC  
19 GCCGCGCCCCGCCGCCACGCTGAGCGCCACCCTCGAGCATTTTCGGCCGGCGCTTTCTCAC  
18 GCCGCGCCCCGCCGCCACGCTGAGCGCCACCCTCGAGCATTTTCGGCCGGCGCTTCCTCAC  
\*\*\*\*\*

PAO1 CAGCCTGCTCGATCCCCGCTGCCAGAGCCTCTATCGCCTGGTGGTGGCGGAATCCCCGCG  
19 CAGCCTGCTCGATCCCCGCTGCCAGAGCCTCTATCGCCTGGTGGTGGCGGAATCCCCGCG  
18 CAGCCTGCTCGATCCCCGCTGCCAGAGCCTCTATCGCCTGGTGGTGGCGGAATCTCCGCG  
\*\*\*\*\*

PAO1 GTTTCGGCGATCGGCAAGTCCTTCTACGAGCAGGGGCCGAGCAGAGCTATCTGCTGCT  
19 GTTTCGGCGATCGGCAAGTCCTTCTACGAGCAGGGGCCGAGCAGAGCTATCTGCTGCT  
18 GTTTCGGCGATCGGCAAGTCCTTCTACGAGCAGGGGCCGAGCAGAGCTACCTGCTGCT  
\*\*\*\*\*

PAO1 CAGCGAGCGACTGGCCGCGGTGCTCCTCACATGGACGAGGAAACGCTCTACGCGGTGGC  
19 CAGCGAGCGACTGGCCGCGGTGCTCCTCACATGGACGAGGAAACGCTCTACGCGGTGGC  
18 CAGCGAGCGACTGGTAGCGGTGCCCCCCCACATGGACGAGGAAACGCTCTACGCGGTGGC  
\*\*\*\*\*

PAO1 CTGCCAGTTTCTCGAGATGCTCAAGGCCGACCTGTTCTCAAGGCCCTCAGCGTGCCGA  
19 CTGCCAGTTTCTCGAGATGCTCAAGGCCGACCTGTTCTCAAGGCCCTCAGCGTGCCGA  
18 CTGCCAGTTTCTCGAGATGCTCAAGGCCGACCTGTTCTCAAGGCCCTCAGCGTGCCGA  
\*\*\*\*\*

PAO1 CTTCCAGCCGACCATGGCGTGCTGGAAACCCGCCTCAAGCTGTCGGTGGACATCATCGC  
19 CTTCCAGCCGACCATGGCGTGCTGGAAACCCGCCTCAAGCTGTCGGTGGACATCATCGC  
18 CTTCCAGCCGACCATGGCACTGCTGGAAACCCGCCTCAAGCTGTCGGTGGACATCATCGC

\*\*\*\*\*

PA01 CTGCTACCTGGAACACCTGTCGCAGAGCCCCGCGCAGGGCTGA  
19 CTGCTACCTGGAACACCTGTCGCAGCGCCCCGCGCAGGGCTGA  
18 CTGCTACCTGGAACACCTGTCGCAGCGCCCCGCGCAGGGCTGA  
\*\*\*\*\*

mexR

CLUSTAL 2.1 multiple sequence alignment

PA01 ATGAACTACCCCGTGAATCCCACCTGATGCCC GCGCTGATGGCGGTCTTCCAGCATGTG  
18 ATGAACTACCCCGTGAATCCCACCTGATGCCC GCGCTGATGGCGGTCTTCCAGCATGTA  
1 ATGAACTACCCCGTGAATCCCACCTGATGCCC GCGCTGATGGCGGTCTTCCAGCATGTG  
\*\*\*\*\*

PA01 CGGACGCGCATCCAGAGCGAGCTCGATTGCCAGCGACTCGACCTGACCCCGCCCCGACGTC  
18 CGGACGCGCATCCAGAGCGAGCTCGATTGCCAGCGACTCGACCTGACCCCGCCCCGACGTC  
1 CGGACGCGC-----GCTCGATTGCCAGCGACTCGACCTGACCCCGCCCCGACGTC  
\*\*\*\*\*

PA01 CATGTATTGAAGCTTATCGACGAACAACGCGGGCTGAACCTGCAGGACCTGGGACGCCAG  
18 CATGTATTGAAGCTTATCGACGAACAACGCGGGCTGAACCTGCAGGACCTGGGACGCCAG  
1 CATGTATTGAAGCTTATCGACGAACAACGCGGGCTGAACCTGCAGGACCTGGGACGCCAG  
\*\*\*\*\*

PA01 ATGTGCCGCGACAAGGCACTGATCACCCGGAAGATCCGCGAGCTGGAGGGAAGAAACCTG  
18 ATGTGCCGCGACAAGGCACTGATCACCCGGAAGATCCGCGAGCTGGAGGGAAGAAACCTG  
1 ATGTGCCGCGACAAGGCACTGATCACCCGGAAGATCCGCGAGCTGGAGGGAAGAAACCTG  
\*\*\*\*\*

PA01 GTCCGCGCGAGCGCAACCCAGCGACCAGCGAGCTTCCAGCTCTTCCTCACCAGACGAG  
18 GTCCGCGCGAGCGCAACCCAGCG-----CAGCTTCCAGCTCTTCCTCACCAGACGAG  
1 GTCCGCGCGAGCGCAACCCAGTGAACAGCGAGCTTCCAGCTCTTCCTCACCAGACGAG  
\*\*\*\*\*

PA01 GGGCTGGCCATCCACCAGCATGCGGAAGCCATCATGTACGCGTGCATGACGAGTTGTTT  
18 GGGCTGGCCATCCACCAGCATGCGGAAGCCATCATGTACGCGTGCATGACGAGTTGTTT  
1 GGGCTGGCCATCCACCAGCATGCGGAAGCCATCATGTACGCGTGCATGACGAGTTGTTT  
\*\*\*\*\*

PA01 GCCCCGCTACCCCGGTGGAACAGGCCACCCTGGTGCATCTCCTCGACCAGTGCCTGGCC  
18 GCCCCGCTACCCCGGAGGAACAAGCCACCCTGGTGCATCTCCTCGACCAATGCCTGGCC



---

1                   GCCCCGCTCACCCGGAGGAACAAGCCACCCTGGTGCATCTCCTCGACCAATGCCTGGCC  
                  \*\*\*\*\*       \*\*\*\*\*       \*\*\*\*\*

PAO1               GCGCAACCGCTTGAGGATATTTAA  
18               GCGCAACCGCTTGAGGATATTTAA  
1               GCGCAACCGCTTGAGGATATTTAA  
                  \*\*\*\*\*

---
